# Supplementary figures and images for: Molecularly imprinted polymer on ionic liquid-modified CdSe/ZnS quantum dots for the highly selective and sensitive optosensing of tocopherol
Source: Royal Society of Chemistry journal article supplement (doi:10.1039/c2jm33522k), 2012-01-01

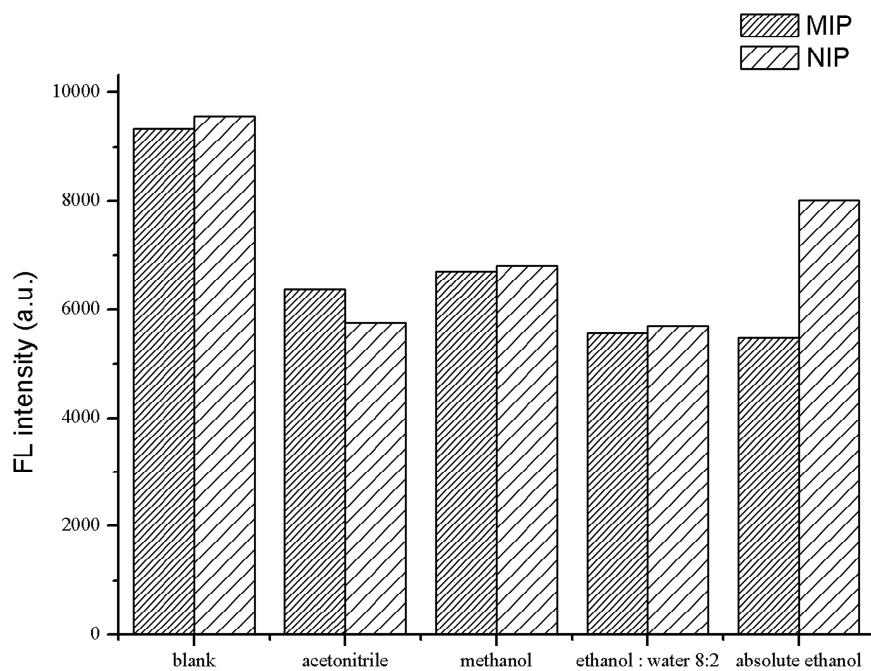

Figure S1

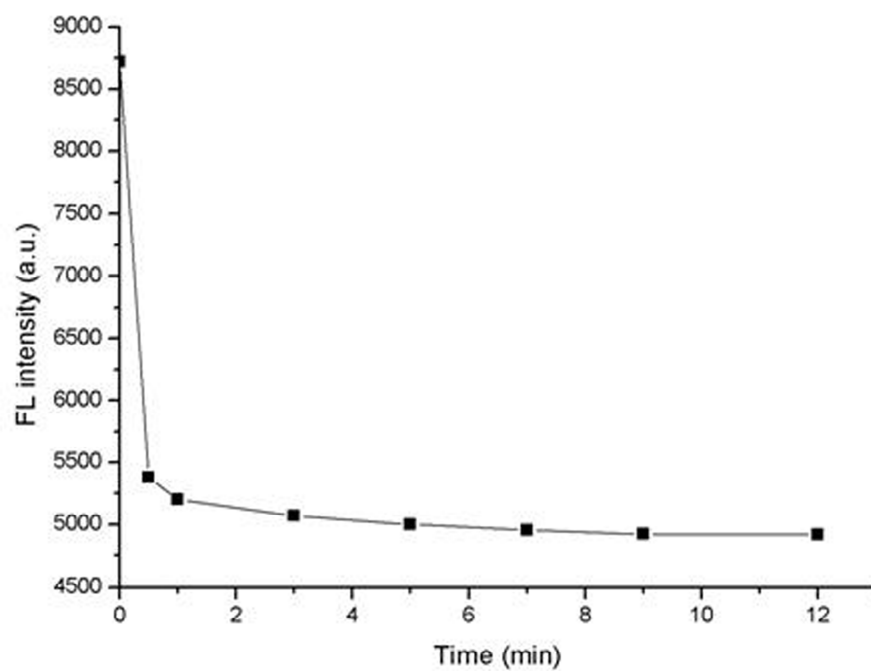

Figure S2

Supplement: c2jm33522k.pdf [file c2jm33522k.pdf]
